# Supplementary material
Source: publisher figshare collection journal article supplement (https://acs.figshare.com/ndownloader/files/4611076)
Supplement: Supplementary file 1 [file 4611076]

data_070402c

 

_audit_creation_method            SHELXL-97

_chemical_name_systematic

;

 ?

;

_chemical_name_common             ?

_chemical_melting_point           ?

_chemical_formula_moiety          ?

_chemical_formula_sum

 'C15 H11 N O'

_chemical_formula_weight          221.25

 

loop_

 _atom_type_symbol

 _atom_type_description

 _atom_type_scat_dispersion_real

 _atom_type_scat_dispersion_imag

 _atom_type_scat_source

 'C'  'C'   0.0033   0.0016

 'International Tables Vol C Tables 4.2.6.8 and 6.1.1.4'

 'H'  'H'   0.0000   0.0000

 'International Tables Vol C Tables 4.2.6.8 and 6.1.1.4'

 'N'  'N'   0.0061   0.0033

 'International Tables Vol C Tables 4.2.6.8 and 6.1.1.4'

 'O'  'O'   0.0106   0.0060

 'International Tables Vol C Tables 4.2.6.8 and 6.1.1.4'

 

_symmetry_cell_setting            Monoclinic

_symmetry_space_group_name_H-M    P2(1)/c

 

loop_

 _symmetry_equiv_pos_as_xyz

 'x, y, z'

 '-x, y+1/2, -z+1/2'

 '-x, -y, -z'

 'x, -y-1/2, z-1/2'

 

_cell_length_a                    11.660(2)

_cell_length_b                    16.607(3)

_cell_length_c                    11.854(2)

_cell_angle_alpha                 90.00

_cell_angle_beta                  90.921(2)

_cell_angle_gamma                 90.00

_cell_volume                      2295.1(7)

_cell_formula_units_Z             8

_cell_measurement_temperature     273(2)

_cell_measurement_reflns_used     2675

_cell_measurement_theta_min       2.72

_cell_measurement_theta_max       23.64

 

_exptl_crystal_description       block

_exptl_crystal_colour             yellow

_exptl_crystal_size_max           0.25

_exptl_crystal_size_mid           0.20

_exptl_crystal_size_min           0.16

_exptl_crystal_density_meas       ?

_exptl_crystal_density_diffrn     1.281

_exptl_crystal_density_method     'not measured'

_exptl_crystal_F_000              928

_exptl_absorpt_coefficient_mu     0.081

_exptl_absorpt_correction_type    multi-scan

_exptl_absorpt_correction_T_min   0.9801

_exptl_absorpt_correction_T_max   0.9872

_exptl_absorpt_process_details    sadabs

 

_exptl_special_details

;

 ?

;

 

_diffrn_ambient_temperature       273(2)

_diffrn_radiation_wavelength      0.71073

_diffrn_radiation_type            MoK\a

_diffrn_radiation_source          'fine-focus sealed tube'

_diffrn_radiation_monochromator   graphite

_diffrn_measurement_device_type   'CCD area detector'

_diffrn_measurement_method        'phi and omega scans'

_diffrn_detector_area_resol_mean  ?

_diffrn_standards_number          ?

_diffrn_standards_interval_count  ?

_diffrn_standards_interval_time   ?

_diffrn_standards_decay_%         ?

_diffrn_reflns_number             11401

_diffrn_reflns_av_R_equivalents   0.0369

_diffrn_reflns_av_sigmaI/netI     0.0443

_diffrn_reflns_limit_h_min        -13

_diffrn_reflns_limit_h_max        13

_diffrn_reflns_limit_k_min        -19

_diffrn_reflns_limit_k_max        14

_diffrn_reflns_limit_l_min        -13

_diffrn_reflns_limit_l_max        14

_diffrn_reflns_theta_min          2.11

_diffrn_reflns_theta_max          25.05

_reflns_number_total              4033

_reflns_number_gt                 2392

_reflns_threshold_expression      >2sigma(I)

 

_computing_data_collection        'Bruker SMART'

_computing_cell_refinement        'Bruker SMART'

_computing_data_reduction         'Bruker SAINT'

_computing_structure_solution     'SHELXS-97 (Sheldrick, 1990)'

_computing_structure_refinement   'SHELXL-97 (Sheldrick, 1997)'

_computing_molecular_graphics     'Bruker SHELXTL'

_computing_publication_material   'Bruker SHELXTL'

 

_refine_special_details

;

 Refinement of F^2^ against ALL reflections.  The weighted R-factor wR and

 goodness of fit S are based on F^2^, conventional R-factors R are based

 on F, with F set to zero for negative F^2^. The threshold expression of

 F^2^ > 2sigma(F^2^) is used only for calculating R-factors(gt) etc. and is

 not relevant to the choice of reflections for refinement.  R-factors based

 on F^2^ are statistically about twice as large as those based on F, and R-

 factors based on ALL data will be even larger.

;

 

_refine_ls_structure_factor_coef  Fsqd

_refine_ls_matrix_type            full

_refine_ls_weighting_scheme       calc

_refine_ls_weighting_details

 'calc w=1/[\s^2^(Fo^2^)+(0.0453P)^2^+0.7498P] where P=(Fo^2^+2Fc^2^)/3'

_atom_sites_solution_primary      direct

_atom_sites_solution_secondary    difmap

_atom_sites_solution_hydrogens    geom

_refine_ls_hydrogen_treatment     constr

_refine_ls_extinction_method      SHELXL

_refine_ls_extinction_coef        0.0030(7)

_refine_ls_extinction_expression

 'Fc^*^=kFc[1+0.001xFc^2^\l^3^/sin(2\q)]^-1/4^'

_refine_ls_number_reflns          4033

_refine_ls_number_parameters      308

_refine_ls_number_restraints      0

_refine_ls_R_factor_all           0.0938

_refine_ls_R_factor_gt            0.0469

_refine_ls_wR_factor_ref          0.1261

_refine_ls_wR_factor_gt           0.1035

_refine_ls_goodness_of_fit_ref    0.973

_refine_ls_restrained_S_all       0.973

_refine_ls_shift/su_max           0.000

_refine_ls_shift/su_mean          0.000

 

loop_

 _atom_site_label

 _atom_site_type_symbol

 _atom_site_fract_x

 _atom_site_fract_y

 _atom_site_fract_z

 _atom_site_U_iso_or_equiv

 _atom_site_adp_type

 _atom_site_occupancy

 _atom_site_symmetry_multiplicity

 _atom_site_calc_flag

 _atom_site_refinement_flags

 _atom_site_disorder_assembly

 _atom_site_disorder_group

C1 C 1.05735(19) 0.37558(15) 0.03559(19) 0.0567(6) Uani 1 1 d . . .

C2 C 1.11450(18) 0.32934(13) 0.12627(17) 0.0490(6) Uani 1 1 d . . .

C3 C 1.22734(18) 0.33129(15) 0.16418(19) 0.0577(6) Uani 1 1 d . . .

H3 H 1.2805 0.3656 0.1316 0.069 Uiso 1 1 calc R . .

C4 C 1.2582(2) 0.28120(15) 0.2510(2) 0.0633(7) Uani 1 1 d . . .

H4 H 1.3335 0.2813 0.2779 0.076 Uiso 1 1 calc R . .

C5 C 1.1784(2) 0.23017(15) 0.2997(2) 0.0639(7) Uani 1 1 d . . .

H5 H 1.2011 0.1968 0.3590 0.077 Uiso 1 1 calc R . .

C6 C 1.06560(19) 0.22825(14) 0.2614(2) 0.0576(6) Uani 1 1 d . . .

H6 H 1.0126 0.1939 0.2941 0.069 Uiso 1 1 calc R . .

C7 C 1.03346(17) 0.27843(13) 0.17350(18) 0.0471(5) Uani 1 1 d . . .

C8 C 0.92263(18) 0.29054(13) 0.11339(18) 0.0491(6) Uani 1 1 d . . .

C9 C 0.82560(18) 0.25151(14) 0.13480(19) 0.0562(6) Uani 1 1 d . . .

H9 H 0.8335 0.2138 0.1923 0.067 Uiso 1 1 calc R . .

C10 C 0.70994(18) 0.25529(14) 0.08747(19) 0.0535(6) Uani 1 1 d . . .

C11 C 0.6275(2) 0.20690(16) 0.1381(2) 0.0666(7) Uani 1 1 d . . .

H11 H 0.6489 0.1741 0.1985 0.080 Uiso 1 1 calc R . .

C12 C 0.5153(2) 0.20664(19) 0.1008(3) 0.0815(9) Uani 1 1 d . . .

H12 H 0.4617 0.1742 0.1362 0.098 Uiso 1 1 calc R . .

C13 C 0.4823(2) 0.2538(2) 0.0118(3) 0.0823(9) Uani 1 1 d . . .

H13 H 0.4063 0.2534 -0.0135 0.099 Uiso 1 1 calc R . .

C14 C 0.5608(2) 0.30145(19) -0.0401(2) 0.0834(9) Uani 1 1 d . . .

H14 H 0.5382 0.3333 -0.1010 0.100 Uiso 1 1 calc R . .

C15 C 0.6746(2) 0.30273(17) -0.0026(2) 0.0726(7) Uani 1 1 d . . .

H15 H 0.7272 0.3357 -0.0384 0.087 Uiso 1 1 calc R . .

C16 C -0.11459(19) 0.46754(14) 0.75819(19) 0.0548(6) Uani 1 1 d . . .

C17 C -0.15987(18) 0.51080(13) 0.65870(18) 0.0514(6) Uani 1 1 d . . .

C18 C -0.2686(2) 0.51071(15) 0.6103(2) 0.0614(6) Uani 1 1 d . . .

H18 H -0.3264 0.4785 0.6391 0.074 Uiso 1 1 calc R . .

C19 C -0.2890(2) 0.55965(16) 0.5179(2) 0.0695(7) Uani 1 1 d . . .

H19 H -0.3615 0.5608 0.4841 0.083 Uiso 1 1 calc R . .

C20 C -0.2018(2) 0.60713(16) 0.4754(2) 0.0713(7) Uani 1 1 d . . .

H20 H -0.2170 0.6401 0.4134 0.086 Uiso 1 1 calc R . .

C21 C -0.0934(2) 0.60658(14) 0.5226(2) 0.0631(7) Uani 1 1 d . . .

H21 H -0.0355 0.6382 0.4927 0.076 Uiso 1 1 calc R . .

C22 C -0.07210(19) 0.55808(13) 0.61568(18) 0.0508(6) Uani 1 1 d . . .

C23 C 0.03278(19) 0.54401(13) 0.68470(18) 0.0505(6) Uani 1 1 d . . .

C24 C 0.1362(2) 0.57492(14) 0.6671(2) 0.0596(6) Uani 1 1 d . . .

H24 H 0.1370 0.6129 0.6094 0.072 Uiso 1 1 calc R . .

C25 C 0.24781(19) 0.56146(14) 0.7194(2) 0.0574(6) Uani 1 1 d . . .

C26 C 0.2692(2) 0.5092(2) 0.8072(3) 0.1032(11) Uani 1 1 d . . .

H26 H 0.2084 0.4816 0.8390 0.124 Uiso 1 1 calc R . .

C27 C 0.3793(3) 0.4967(2) 0.8494(3) 0.1145(12) Uani 1 1 d . . .

H27 H 0.3911 0.4609 0.9088 0.137 Uiso 1 1 calc R . .

C28 C 0.4695(2) 0.5358(2) 0.8055(3) 0.0930(10) Uani 1 1 d . . .

H28 H 0.5434 0.5268 0.8334 0.112 Uiso 1 1 calc R . .

C29 C 0.4508(3) 0.5881(2) 0.7203(3) 0.0941(10) Uani 1 1 d . . .

H29 H 0.5124 0.6159 0.6900 0.113 Uiso 1 1 calc R . .

C30 C 0.3421(2) 0.60121(16) 0.6775(2) 0.0768(8) Uani 1 1 d . . .

H30 H 0.3318 0.6378 0.6188 0.092 Uiso 1 1 calc R . .

N1 N 0.94398(15) 0.35041(11) 0.03185(15) 0.0557(5) Uani 1 1 d . . .

H1 H 0.8930 0.3690 -0.0144 0.067 Uiso 1 1 calc R . .

N2 N -0.00082(15) 0.48917(11) 0.76925(15) 0.0531(5) Uani 1 1 d . . .

H2 H 0.0445 0.4714 0.8215 0.064 Uiso 1 1 calc R . .

O1 O 1.09873(13) 0.42671(11) -0.02760(13) 0.0725(5) Uani 1 1 d . . .

O2 O -0.16471(13) 0.41988(10) 0.82216(14) 0.0686(5) Uani 1 1 d . . .

 

loop_

 _atom_site_aniso_label

 _atom_site_aniso_U_11

 _atom_site_aniso_U_22

 _atom_site_aniso_U_33

 _atom_site_aniso_U_23

 _atom_site_aniso_U_13

 _atom_site_aniso_U_12

C1 0.0450(14) 0.0715(17) 0.0537(14) -0.0036(13) 0.0053(11) -0.0050(12)

C2 0.0404(13) 0.0626(15) 0.0441(12) -0.0081(11) 0.0039(10) 0.0007(11)

C3 0.0419(14) 0.0735(17) 0.0576(15) -0.0074(13) 0.0024(11) -0.0046(11)

C4 0.0422(14) 0.0810(18) 0.0663(17) -0.0101(15) -0.0081(12) 0.0029(13)

C5 0.0590(16) 0.0736(17) 0.0590(15) -0.0003(13) -0.0069(12) 0.0023(13)

C6 0.0488(15) 0.0645(15) 0.0596(15) -0.0027(13) 0.0017(11) -0.0055(11)

C7 0.0385(12) 0.0556(14) 0.0472(13) -0.0085(11) 0.0045(10) 0.0010(10)

C8 0.0445(13) 0.0550(14) 0.0480(13) -0.0071(11) 0.0071(10) 0.0010(11)

C9 0.0456(14) 0.0643(15) 0.0587(14) -0.0026(12) 0.0049(11) -0.0027(11)

C10 0.0399(13) 0.0677(15) 0.0530(14) -0.0110(13) 0.0013(10) -0.0001(11)

C11 0.0513(16) 0.0816(18) 0.0670(16) -0.0092(14) 0.0066(12) -0.0125(13)

C12 0.0520(18) 0.113(2) 0.080(2) -0.0203(19) 0.0080(15) -0.0185(16)

C13 0.0435(16) 0.126(3) 0.077(2) -0.0279(19) -0.0009(14) -0.0023(17)

C14 0.0591(18) 0.117(2) 0.0732(18) -0.0017(18) -0.0090(14) 0.0115(17)

C15 0.0472(16) 0.096(2) 0.0749(18) 0.0087(16) 0.0017(13) -0.0028(14)

C16 0.0518(15) 0.0558(14) 0.0569(15) -0.0016(12) 0.0023(11) -0.0017(11)

C17 0.0487(14) 0.0502(14) 0.0554(14) -0.0045(11) -0.0006(11) 0.0054(11)

C18 0.0556(16) 0.0617(16) 0.0668(16) -0.0024(13) -0.0032(12) 0.0011(12)

C19 0.0633(18) 0.0743(18) 0.0704(17) -0.0050(15) -0.0127(13) 0.0122(14)

C20 0.084(2) 0.0688(18) 0.0612(16) 0.0069(14) -0.0054(14) 0.0136(15)

C21 0.0648(17) 0.0622(16) 0.0625(16) 0.0051(13) 0.0061(13) 0.0043(12)

C22 0.0539(15) 0.0460(13) 0.0528(14) -0.0040(11) 0.0060(11) 0.0065(11)

C23 0.0524(15) 0.0454(13) 0.0539(14) -0.0036(11) 0.0079(11) 0.0022(11)

C24 0.0595(16) 0.0560(14) 0.0637(15) 0.0009(13) 0.0113(12) 0.0011(12)

C25 0.0483(15) 0.0609(15) 0.0631(15) -0.0023(13) 0.0084(12) -0.0003(12)

C26 0.0478(17) 0.142(3) 0.120(3) 0.060(2) 0.0045(16) -0.0053(17)

C27 0.062(2) 0.161(3) 0.120(3) 0.059(3) -0.0008(18) 0.003(2)

C28 0.0530(18) 0.120(3) 0.106(2) -0.002(2) -0.0028(16) -0.0057(18)

C29 0.061(2) 0.103(2) 0.120(3) 0.005(2) 0.0071(18) -0.0226(17)

C30 0.0633(18) 0.0768(19) 0.090(2) 0.0081(16) 0.0101(15) -0.0149(14)

N1 0.0448(11) 0.0700(13) 0.0525(11) 0.0059(10) 0.0017(8) -0.0005(10)

N2 0.0463(11) 0.0575(12) 0.0556(12) 0.0082(10) 0.0013(9) -0.0006(9)

O1 0.0559(11) 0.0957(13) 0.0659(11) 0.0229(10) -0.0010(8) -0.0183(9)

O2 0.0573(10) 0.0788(11) 0.0696(11) 0.0157(10) -0.0020(8) -0.0138(9)

 

_geom_special_details

;

 All esds (except the esd in the dihedral angle between two l.s. planes)

 are estimated using the full covariance matrix.  The cell esds are taken

 into account individually in the estimation of esds in distances, angles

 and torsion angles; correlations between esds in cell parameters are only

 used when they are defined by crystal symmetry.  An approximate (isotropic)

 treatment of cell esds is used for estimating esds involving l.s. planes.

;

 

loop_

 _geom_bond_atom_site_label_1

 _geom_bond_atom_site_label_2

 _geom_bond_distance

 _geom_bond_site_symmetry_2

 _geom_bond_publ_flag

C1 O1 1.236(3) . ?

C1 N1 1.386(3) . ?

C1 C2 1.472(3) . ?

C2 C3 1.384(3) . ?

C2 C7 1.392(3) . ?

C3 C4 1.367(3) . ?

C3 H3 0.9300 . ?

C4 C5 1.391(3) . ?

C4 H4 0.9300 . ?

C5 C6 1.385(3) . ?

C5 H5 0.9300 . ?

C6 C7 1.381(3) . ?

C6 H6 0.9300 . ?

C7 C8 1.479(3) . ?

C8 C9 1.332(3) . ?

C8 N1 1.412(3) . ?

C9 C10 1.454(3) . ?

C9 H9 0.9300 . ?

C10 C15 1.385(3) . ?

C10 C11 1.396(3) . ?

C11 C12 1.375(3) . ?

C11 H11 0.9300 . ?

C12 C13 1.363(4) . ?

C12 H12 0.9300 . ?

C13 C14 1.365(4) . ?

C13 H13 0.9300 . ?

C14 C15 1.392(3) . ?

C14 H14 0.9300 . ?

C15 H15 0.9300 . ?

C16 O2 1.248(3) . ?

C16 N2 1.379(3) . ?

C16 C17 1.472(3) . ?

C17 C18 1.383(3) . ?

C17 C22 1.393(3) . ?

C18 C19 1.381(3) . ?

C18 H18 0.9300 . ?

C19 C20 1.388(3) . ?

C19 H19 0.9300 . ?

C20 C21 1.374(3) . ?

C20 H20 0.9300 . ?

C21 C22 1.385(3) . ?

C21 H21 0.9300 . ?

C22 C23 1.479(3) . ?

C23 C24 1.330(3) . ?

C23 N2 1.414(3) . ?

C24 C25 1.450(3) . ?

C24 H24 0.9300 . ?

C25 C26 1.375(3) . ?

C25 C30 1.381(3) . ?

C26 C27 1.386(4) . ?

C26 H26 0.9300 . ?

C27 C28 1.348(4) . ?

C27 H27 0.9300 . ?

C28 C29 1.348(4) . ?

C28 H28 0.9300 . ?

C29 C30 1.375(4) . ?

C29 H29 0.9300 . ?

C30 H30 0.9300 . ?

N1 H1 0.8600 . ?

N2 H2 0.8600 . ?

 

loop_

 _geom_angle_atom_site_label_1

 _geom_angle_atom_site_label_2

 _geom_angle_atom_site_label_3

 _geom_angle

 _geom_angle_site_symmetry_1

 _geom_angle_site_symmetry_3

 _geom_angle_publ_flag

O1 C1 N1 124.7(2) . . ?

O1 C1 C2 128.7(2) . . ?

N1 C1 C2 106.64(19) . . ?

C3 C2 C7 122.1(2) . . ?

C3 C2 C1 129.9(2) . . ?

C7 C2 C1 107.95(19) . . ?

C4 C3 C2 117.9(2) . . ?

C4 C3 H3 121.1 . . ?

C2 C3 H3 121.1 . . ?

C3 C4 C5 120.9(2) . . ?

C3 C4 H4 119.5 . . ?

C5 C4 H4 119.5 . . ?

C6 C5 C4 121.0(2) . . ?

C6 C5 H5 119.5 . . ?

C4 C5 H5 119.5 . . ?

C7 C6 C5 118.6(2) . . ?

C7 C6 H6 120.7 . . ?

C5 C6 H6 120.7 . . ?

C6 C7 C2 119.5(2) . . ?

C6 C7 C8 132.0(2) . . ?

C2 C7 C8 108.49(19) . . ?

C9 C8 N1 129.3(2) . . ?

C9 C8 C7 125.5(2) . . ?

N1 C8 C7 105.26(18) . . ?

C8 C9 C10 133.7(2) . . ?

C8 C9 H9 113.1 . . ?

C10 C9 H9 113.1 . . ?

C15 C10 C11 117.4(2) . . ?

C15 C10 C9 125.8(2) . . ?

C11 C10 C9 116.8(2) . . ?

C12 C11 C10 121.4(3) . . ?

C12 C11 H11 119.3 . . ?

C10 C11 H11 119.3 . . ?

C13 C12 C11 120.2(3) . . ?

C13 C12 H12 119.9 . . ?

C11 C12 H12 119.9 . . ?

C12 C13 C14 119.9(3) . . ?

C12 C13 H13 120.0 . . ?

C14 C13 H13 120.0 . . ?

C13 C14 C15 120.5(3) . . ?

C13 C14 H14 119.7 . . ?

C15 C14 H14 119.7 . . ?

C10 C15 C14 120.5(2) . . ?

C10 C15 H15 119.7 . . ?

C14 C15 H15 119.7 . . ?

O2 C16 N2 124.5(2) . . ?

O2 C16 C17 129.1(2) . . ?

N2 C16 C17 106.34(19) . . ?

C18 C17 C22 121.5(2) . . ?

C18 C17 C16 130.3(2) . . ?

C22 C17 C16 108.2(2) . . ?

C19 C18 C17 118.3(2) . . ?

C19 C18 H18 120.9 . . ?

C17 C18 H18 120.9 . . ?

C18 C19 C20 120.3(2) . . ?

C18 C19 H19 119.8 . . ?

C20 C19 H19 119.8 . . ?

C21 C20 C19 121.5(2) . . ?

C21 C20 H20 119.3 . . ?

C19 C20 H20 119.3 . . ?

C20 C21 C22 118.7(2) . . ?

C20 C21 H21 120.6 . . ?

C22 C21 H21 120.6 . . ?

C21 C22 C17 119.7(2) . . ?

C21 C22 C23 132.0(2) . . ?

C17 C22 C23 108.32(19) . . ?

C24 C23 N2 128.5(2) . . ?

C24 C23 C22 126.6(2) . . ?

N2 C23 C22 104.94(18) . . ?

C23 C24 C25 133.1(2) . . ?

C23 C24 H24 113.5 . . ?

C25 C24 H24 113.5 . . ?

C26 C25 C30 116.0(2) . . ?

C26 C25 C24 124.9(2) . . ?

C30 C25 C24 119.1(2) . . ?

C25 C26 C27 121.6(3) . . ?

C25 C26 H26 119.2 . . ?

C27 C26 H26 119.2 . . ?

C28 C27 C26 120.8(3) . . ?

C28 C27 H27 119.6 . . ?

C26 C27 H27 119.6 . . ?

C27 C28 C29 118.8(3) . . ?

C27 C28 H28 120.6 . . ?

C29 C28 H28 120.6 . . ?

C28 C29 C30 121.0(3) . . ?

C28 C29 H29 119.5 . . ?

C30 C29 H29 119.5 . . ?

C29 C30 C25 121.7(3) . . ?

C29 C30 H30 119.1 . . ?

C25 C30 H30 119.1 . . ?

C1 N1 C8 111.65(18) . . ?

C1 N1 H1 124.2 . . ?

C8 N1 H1 124.2 . . ?

C16 N2 C23 112.18(18) . . ?

C16 N2 H2 123.9 . . ?

C23 N2 H2 123.9 . . ?

 

loop_

 _geom_hbond_atom_site_label_D

 _geom_hbond_atom_site_label_H

 _geom_hbond_atom_site_label_A

 _geom_hbond_distance_DH

 _geom_hbond_distance_HA

 _geom_hbond_distance_DA

 _geom_hbond_angle_DHA

 _geom_hbond_site_symmetry_A

N1 H1 O2  0.86 2.21 3.002(2) 153.5 1_654

N2 H2 O1  0.86 2.03 2.852(2) 160.1 1_456

 

_diffrn_measured_fraction_theta_max    0.995

_diffrn_reflns_theta_full              25.05

_diffrn_measured_fraction_theta_full   0.995

_refine_diff_density_max    0.202

_refine_diff_density_min   -0.142

_refine_diff_density_rms    0.034
